# Supplementary material for: Joint CB1 and NGF Receptor Activation Suppresses TRPM8 Activation in Etoposide-Resistant Retinoblastoma Cells
Source: MDPI journal article supplement (doi:10.3390/ijms25031733), 2024-01-31
Supplement: s1 [file s1]

## Supplementary Materials

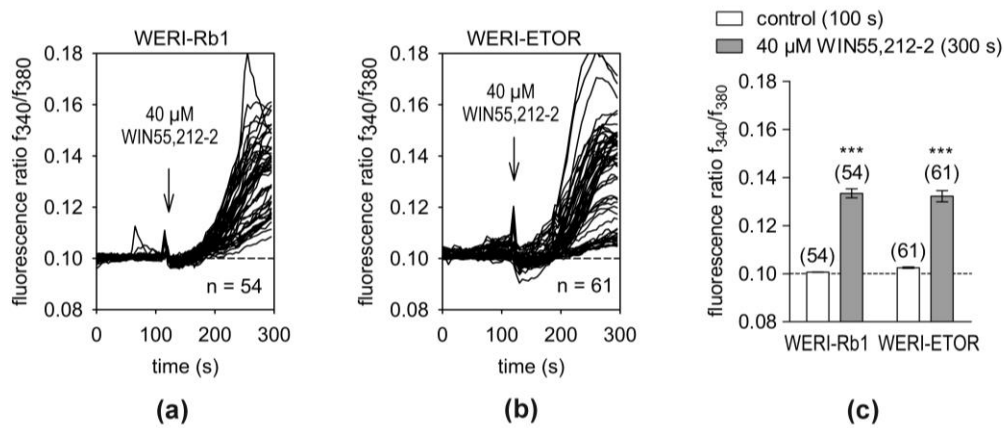

**Figure S1:** WIN55,212-2 increases intracellular  $\text{Ca}^{2+}$  in WERI-Rb1 and WERI-ETOR cells at the same level. (a) The time dependent changes are shown as relative intracellular  $\text{Ca}^{2+}$  levels in fura2-loaded WERI-Rb1 cells. Data are represented in single traces. n indicates the number of cells examined in this set of experiments (n = 54). The dashed line represents the reference line for baseline value (0.1). The arrow indicates the point of time of application of WIN55,212-2 (40  $\mu$ M). (b) Same experiment as shown in panel (a) but with WERI-ETOR cells (n = 61). Extracellular application WIN55,212-2 induced an increase in  $\text{Ca}^{2+}$  influxes, which are comparable with those of WERI-Rb1 cells. (c) Summary of the experiments with WIN55,212-2. Columns represent mean values  $\pm$  SEM of fluorescence ratio at 100 and 300 s. The numbers of cells measured in both experiments are indicated in brackets above the columns. The asterisks (\*\*\*) designate significant increases in  $[\text{Ca}^{2+}]_i$  in the presence of WIN55,212-2 (gray columns at t = 300 s; n = 54 - 61; \*\*\*p < 0.001; paired tested).

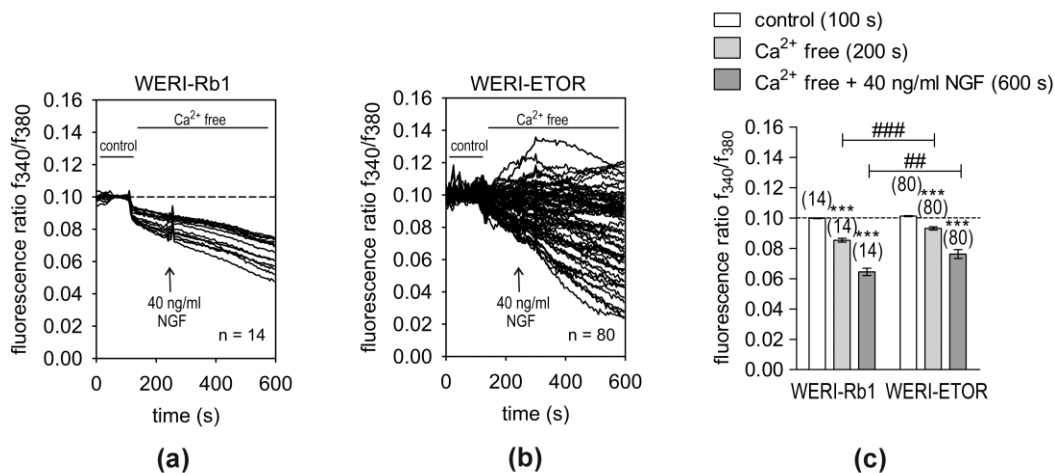

**Figure S2:** NGF does not change intracellular  $\text{Ca}^{2+}$  in WERI-Rb1 and WERI-ETOR cells in  $\text{Ca}^{2+}$  free conditions. (a) The time dependent changes are shown as relative intracellular  $\text{Ca}^{2+}$  levels in fura2-loaded WERI-Rb1 cells. Data are represented in single traces. n indicates the number of cells examined in this set of experiment (n = 14). The dashed line represents the reference line for baseline value (0.1). The arrow indicates the point of time of application of NGF (40 ng/ml). (b) Same experiment as shown in panel (a) but with WERI-ETOR cells (n = 80). Extracellular application NGF induced a heterogeneous increase in  $\text{Ca}^{2+}$  influxes, in comparison with the WERI-Rb1 cells. (c) Summary of the experiments with NGF experiment in  $\text{Ca}^{2+}$  free conditions. Columns represent mean values  $\pm$  SEM of fluorescence ratio at 100, 200 and 600 s. The numbers of cells measured in both experiments are indicated in brackets above the columns. The asterisks (\*\*\*) designate significant

decreases in  $[Ca^{2+}]_i$  in the presence of a  $Ca^{2+}$  free RLS (gray columns at  $t = 200$  and  $600$  s;  $n = 14 - 80$ ; \*\*\* $p < 0.001$ ; paired tested). The hashtags (##) designate significant differences in the decreases in  $[Ca^{2+}]_i$  between WERI-Rb1 and WERI-ETOR (gray columns at  $t = 200$  and  $600$  s;  $n = 14 - 80$ ; ## $p < 0.01$  at the minimum; unpaired tested).
